# Supplementary material
Source: publisher figshare collection journal article supplement (https://microbiology.figshare.com/ndownloader/files/36343884)
Supplement: Supplementary file 1 [file 36343884]

## Sheet: Table S1 Genome Accessions
Genbank Assembly Accession	Full Set	P1 Set
JAIZBH00000000 Leptospira sanjuanensis LGVF01	x	x
JAIZBG00000000 Leptospira sanjuanensis LGVF02	x	x
GCA_000017605.1 Leptospira biflexa Patoc 1 Ames	x
GCA_000216455.2 Leptospira licerasiae MMD0835	x
GCA_000243715.3 Leptospira broomii 5399	x
GCA_000243815.3 Leptospira alexanderi L60	x	x
GCA_000244815.3 Leptospira weilii LT2116	x	x
GCA_000304275.1 Leptospira meyeri Went 5	x
GCA_000306235.2 Leptospira fainei BUT 6	x
GCA_000306255.2 Leptospira noguchii CZ214	x	x
GCA_000306675.3 Leptospira mayottensis 200901116	x	x
GCA_000313175.2 Leptospira santarosai LT821	x	x
GCA_000332475.2 Leptospira yanagawae ATCC 700523	x
GCA_000332495.2 Leptospira terpstrae ATCC 700639	x
GCA_000332515.2 Leptospira wolbachii CDC	x
GCA_000347175.1 Leptospira alstonii 79601	x	x
GCA_001292615.2 Leptospira interrogans RCA	x	x
GCA_001444465.1 Leptospira borgpetersenii 56604	x	x
GCA_001584245.1 Leptospira kirschneri ZV013	x	x
GCA_001704175.2 Leptospira inadai M34-99	x
GCA_001729245.1 Leptospira tipperaryensis GWTS1	x	x
GCA_002150035.1 Leptospira venezuelensis CLM-U50	x
GCA_002811455.1 Leptospira kmetyi JW2-C-B1	x	x
GCA_002811475.1 Leptospira hartskeerlii MCA2-B-A3	x
GCA_002811765.1 Leptospira saintgironsiae FH4-C-A2	x
GCA_002811865.1 Leptospira perolatii FH1-B-C1	x
GCA_002811925.1 Leptospira barantonii FH4-C-A1	x	x
GCA_002811945.1 Leptospira harrisiae FH2-B-A1	x
GCA_002811955.1 Leptospira ellisii ATI7-C-A5	x	x
GCA_002811985.1 Leptospira adleri FH2-B-D1	x	x
GCA_002812045.1 Leptospira haakeii ATI7-C-A4	x
GCA_002812125.1 Leptospira brenneri JW2-C-A2	x
GCA_002812165.1 Leptospira levettii CN6-C-A1	x
GCA_002812205.1 Leptospira neocaledonica ES4-C-A1	x
GCA_003112675.1 Leptospira johnsonii E8	x
GCA_003114815.1 Leptospira ellinghausenii E18	x
GCA_003114835.2 Leptospira kobayashii E30	x
GCA_003114855.1 Leptospira ryugenii YH101	x
GCA_003545865.1 Leptospira yasudae B21	x	x
GCA_003545885.1 Leptospira stimsonii Yale	x	x
GCA_004769195.1 Leptospira fletcheri SSW15	x
GCA_004769225.1 Leptospira kanakyensis 201800294	x
GCA_004769425.1 Leptospira gomenensis 201800298	x	x
GCA_004769455.1 Leptospira montravelensis 201800279	x
GCA_004769555.1 Leptospira koniambonensis 201800265	x
GCA_004769575.1 Leptospira perdikensis 201702692	x
GCA_004769595.1 Leptospira langatensis 201702690	x
GCA_004769615.1 Leptospira sarikeiensis 201702455	x
GCA_004769665.1 Leptospira kemamanensis 201702454	x
GCA_004769775.1 Leptospira jelokensis 201702419	x
GCA_004770055.1 Leptospira semungkisensis SSS9	x
GCA_004770105.1 Leptospira andrefontaineae 201800301	x
GCA_004770145.1 Leptospira bourretii 201800267	x
GCA_004770215.1 Leptospira congkakensis 201702425	x
GCA_004770365.1 Leptospira vanthielii 201601955	x
GCA_004770445.1 Leptospira bouyouniensis 201601297	x
GCA_004770475.1 Leptospira mtsangambouensis 201601298	x
GCA_004770705.1 Leptospira wolffii 201702691	x
GCA_004770745.1 Leptospira ognonensis 201702476	x
GCA_004770765.1 Leptospira noumeaensis 201800287	x
GCA_004770835.1 Leptospira selangorensis 201702406	x
GCA_004770895.1 Leptospira dzoumogneensis 201601113	x
GCA_004770905.1 Leptospira bandrabouensis 201601111	x
GCA_004770995.1 Leptospira idonii 201300427	x
GCA_004771005.1 Leptospira ilyithenensis 201400974	x
GCA_004771275.1 Leptospira fluminis SCS5	x
GCA_016918735.1 Leptospira abararensis 201903074	x
GCA_016918785.1 Leptospira ainazelensis 201903071	x	x
GCA_016919165.1 Leptospira chreensis 201903075	x
GCA_016919175.1 Leptospira ainlahdjerensis 201903070	x	x

## Sheet: Table S2 16S Identity
	Leptospira sanjuanensis LGVF01	Leptospira sanjuanensis LGVF02
JAIZBH00000000 Leptospira sanjuanensis LGVF01	100	-
JAIZBG00000000 Leptospira sanjuanensis LGVF02	100	100
GCA_003545865.1 Leptospira yasudae B21	99.8685	99.8685
GCA_002811955.1 Leptospira ellisii ATI7-C-A5	99.6713	99.6713
GCA_002811455.1 Leptospira kmetyi JW2-C-B1	99.6055	99.6055
GCA_001584245.1 Leptospira kirschneri ZV013	99.3425	99.3425
GCA_002811925.1 Leptospira barantonii FH4-C-A1	99.3425	99.3425
GCA_004769425.1 Leptospira gomenensis 201800298	99.3425	99.3425
GCA_000306255.2 Leptospira noguchii CZ214	99.2768	99.2768
GCA_000306675.3 Leptospira mayottensis 200901116	99.2768	99.2768
GCA_000347175.1 Leptospira alstonii 79601	99.2768	99.2768
GCA_001292615.2 Leptospira interrogans RCA	99.2768	99.2768
GCA_001444465.1 Leptospira borgpetersenii 56604	99.211	99.211
GCA_000243815.3 Leptospira alexanderi L60	99.0138	99.0138
GCA_000244815.3 Leptospira weilii LT2116	99.0138	99.0138
GCA_002811985.1 Leptospira adleri FH2-B-D1	99.0138	99.0138
GCA_001729245.1 Leptospira tipperaryensis GWTS1	98.9481	98.9481
GCA_003545885.1 Leptospira stimsonii Yale	98.9481	98.9481
GCA_016918785.1 Leptospira ainazelensis 201903071	98.8823	98.8823
GCA_000313175.2 Leptospira santarosai LT821	98.8166	98.8166
GCA_016919175.1 Leptospira ainlahdjerensis 201903070	98.7508	98.7508
GCA_000216455.2 Leptospira licerasiae MMD0835	96.1867	96.1867
GCA_004770835.1 Leptospira selangorensis 201702406	96.121	96.121
GCA_004770895.1 Leptospira dzoumogneensis 201601113	95.9895	95.9895
GCA_002150035.1 Leptospira venezuelensis CLM-U50	95.9237	95.9237
GCA_002811865.1 Leptospira perolatii FH1-B-C1	95.9237	95.9237
GCA_004770105.1 Leptospira andrefontaineae 201800301	95.9237	95.9237
GCA_002811475.1 Leptospira hartskeerlii MCA2-B-A3	95.858	95.858
GCA_002812045.1 Leptospira haakeii ATI7-C-A4	95.858	95.858
GCA_004769595.1 Leptospira langatensis 201702690	95.7922	95.7922
GCA_004769615.1 Leptospira sarikeiensis 201702455	95.7922	95.7922
GCA_004770055.1 Leptospira semungkisensis SSS9	95.7265	95.7265
GCA_002811765.1 Leptospira saintgironsiae FH4-C-A2	95.6607	95.6607
GCA_002812205.1 Leptospira neocaledonica ES4-C-A1	95.6607	95.6607
GCA_003112675.1 Leptospira johnsonii E8	95.6607	95.6607
GCA_004769555.1 Leptospira koniambonensis 201800265	95.6607	95.6607
GCA_004770705.1 Leptospira wolffii 201702691	95.6607	95.6607
GCA_000306235.2 Leptospira fainei BUT 6	95.5293	95.5293
GCA_000243715.3 Leptospira broomii 5399	95.332	95.332
GCA_001704175.2 Leptospira inadai M34-99	95.332	95.332
GCA_004771275.1 Leptospira fluminis SCS5	95.2005	95.2005
GCA_004769195.1 Leptospira fletcheri SSW15	95.1348	95.1348
GCA_004770745.1 Leptospira ognonensis 201702476	90.3353	90.3353
GCA_004769575.1 Leptospira perdikensis 201702692	90.2696	90.2696
GCA_004770995.1 Leptospira idonii 201300427	90.2038	90.2038
GCA_002812125.1 Leptospira brenneri JW2-C-A2	90.1381	90.1381
GCA_004769225.1 Leptospira kanakyensis 201800294	90.1381	90.1381
GCA_003114835.2 Leptospira kobayashii E30	90.0723	90.0723
GCA_004770215.1 Leptospira congkakensis 201702425	90.0723	90.0723
GCA_004770475.1 Leptospira mtsangambouensis 201601298	90.0723	90.0723
GCA_004770765.1 Leptospira noumeaensis 201800287	90.0723	90.0723
GCA_004769775.1 Leptospira jelokensis 201702419	90.0066	90.0066
GCA_004770145.1 Leptospira bourretii 201800267	90.0066	90.0066
GCA_004771005.1 Leptospira ilyithenensis 201400974	90.0066	90.0066
GCA_002812165.1 Leptospira levettii CN6-C-A1	89.9408	89.9408
GCA_000017605.1 Leptospira biflexa Patoc 1 Ames	89.8751	89.8751
GCA_004770365.1 Leptospira vanthielii 201601955	89.8751	89.8751
GCA_000332495.2 Leptospira terpstrae ATCC 700639	89.8093	89.8093
GCA_002811945.1 Leptospira harrisiae FH2-B-A1	89.8093	89.8093
GCA_016918735.1 Leptospira abararensis 201903074	89.8093	89.8093
GCA_016919165.1 Leptospira chreensis 201903075	89.8093	89.8093
GCA_000304275.1 Leptospira meyeri Went 5	89.7436	89.7436
GCA_003114815.1 Leptospira ellinghausenii E18	89.7436	89.7436
GCA_004769455.1 Leptospira montravelensis 201800279	89.7436	89.7436
GCA_003114855.1 Leptospira ryugenii YH101	89.6778	89.6778
GCA_004769665.1 Leptospira kemamanensis 201702454	89.6778	89.6778
GCA_004770445.1 Leptospira bouyouniensis 201601297	89.6778	89.6778
GCA_004770905.1 Leptospira bandrabouensis 201601111	89.6778	89.6778
GCA_000332515.2 Leptospira wolbachii CDC	89.6121	89.6121
GCA_000332475.2 Leptospira yanagawae ATCC 700523	89.4806	89.4806
GCA_002009735.1 Leptonema_illini	85.6673	85.6673

## Sheet: Table S3 MASH
	Leptospira sanjuanensis LGVF01	Leptospira sanjuanensis LGVF02
JAIZBH00000000 Leptospira sanjuanensis LGVF01	0	-
JAIZBG00000000 Leptospira sanjuanensis LGVF02	0.00751912	0
GCA_003545865.1 Leptospira yasudae B21	0.060969	0.0620782
GCA_002811455.1 Leptospira kmetyi JW2-C-B1	0.13492	0.135534
GCA_002811925.1 Leptospira barantonii FH4-C-A1	0.138407	0.138572
GCA_000347175.1 Leptospira alstonii 79601	0.170926	0.169931
GCA_002811985.1 Leptospira adleri FH2-B-D1	0.172984	0.173336
GCA_003545885.1 Leptospira stimsonii Yale	0.174048	0.173691
GCA_004769425.1 Leptospira gomenensis 201800298	0.174771	0.175878
GCA_001729245.1 Leptospira tipperaryensis GWTS1	0.175506	0.174771
GCA_016918785.1 Leptospira ainazelensis 201903071	0.176252	0.175878
GCA_016919175.1 Leptospira ainlahdjerensis 201903070	0.178567	0.178964
GCA_002811955.1 Leptospira ellisii ATI7-C-A5	0.183572	0.182269
GCA_000313175.2 Leptospira santarosai LT821	0.184461	0.185367
GCA_000244815.3 Leptospira weilii LT2116	0.188197	0.187235
GCA_001444465.1 Leptospira borgpetersenii 56604	0.188686	0.187235
GCA_000243815.3 Leptospira alexanderi L60	0.18918	0.189679
GCA_000306675.3 Leptospira mayottensis 200901116	0.194988	0.195553
GCA_000306255.2 Leptospira noguchii CZ214	0.201619	0.203604
GCA_001584245.1 Leptospira kirschneri ZV013	0.202271	0.202271
GCA_001292615.2 Leptospira interrogans RCA	0.210114	0.211692
GCA_004770705.1 Leptospira wolffii 201702691	0.273629	0.270747
GCA_002811475.1 Leptospira hartskeerlii MCA2-B-A3	0.276697	0.279978
GCA_003112675.1 Leptospira johnsonii E8	0.283502	0.283502
GCA_004770895.1 Leptospira dzoumogneensis 201601113	0.283502	0.276697
GCA_004769195.1 Leptospira fletcheri SSW15	0.287309	0.283502
GCA_001704175.2 Leptospira inadai M34-99	0.295981	0.291447
GCA_002811765.1 Leptospira saintgironsiae FH4-C-A2	0.295981	0.291447
GCA_004769595.1 Leptospira langatensis 201702690	0.295981	0.291447
GCA_000216455.2 Leptospira licerasiae MMD0835	0.300994	0.295981
GCA_000306235.2 Leptospira fainei BUT 6	0.300994	0.291447
GCA_002812205.1 Leptospira neocaledonica ES4-C-A1	0.300994	0.295981
GCA_004769555.1 Leptospira koniambonensis 201800265	0.300994	0.306598
GCA_004770105.1 Leptospira andrefontaineae 201800301	0.300994	0.306598
GCA_004770995.1 Leptospira idonii 201300427	0.300994	0.295981
GCA_004771275.1 Leptospira fluminis SCS5	0.300994	0.291447
GCA_000243715.3 Leptospira broomii 5399	0.306598	0.300994
GCA_002150035.1 Leptospira venezuelensis CLM-U50	0.306598	0.300994
GCA_003114835.2 Leptospira kobayashii E30	0.306598	0.312952
GCA_004770055.1 Leptospira semungkisensis SSS9	0.306598	0.295981
GCA_004770835.1 Leptospira selangorensis 201702406	0.306598	0.300994
GCA_004771005.1 Leptospira ilyithenensis 201400974	0.306598	0.300994
GCA_002811865.1 Leptospira perolatii FH1-B-C1	0.312952	0.306598
GCA_004769615.1 Leptospira sarikeiensis 201702455	0.312952	0.312952
GCA_002812045.1 Leptospira haakeii ATI7-C-A4	0.320287	0.312952
GCA_004769455.1 Leptospira montravelensis 201800279	0.320287	0.320287
GCA_004769665.1 Leptospira kemamanensis 201702454	0.320287	0.320287
GCA_004770765.1 Leptospira noumeaensis 201800287	0.320287	0.320287
GCA_000017605.1 Leptospira biflexa Patoc 1 Ames	0.328965	0.328965
GCA_000304275.1 Leptospira meyeri Went 5	0.328965	0.328965
GCA_000332515.2 Leptospira wolbachii CDC	0.328965	0.328965
GCA_002812125.1 Leptospira brenneri JW2-C-A2	0.328965	0.328965
GCA_003114855.1 Leptospira ryugenii YH101	0.328965	0.328965
GCA_004769775.1 Leptospira jelokensis 201702419	0.328965	0.328965
GCA_004770145.1 Leptospira bourretii 201800267	0.328965	0.328965
GCA_004770215.1 Leptospira congkakensis 201702425	0.328965	0.328965
GCA_004770475.1 Leptospira mtsangambouensis 201601298	0.328965	0.328965
GCA_016919165.1 Leptospira chreensis 201903075	0.328965	0.328965
GCA_000332475.2 Leptospira yanagawae ATCC 700523	0.339586	0.339586
GCA_000332495.2 Leptospira terpstrae ATCC 700639	0.339586	0.339586
GCA_002811945.1 Leptospira harrisiae FH2-B-A1	0.339586	0.339586
GCA_002812165.1 Leptospira levettii CN6-C-A1	0.339586	0.339586
GCA_003114815.1 Leptospira ellinghausenii E18	0.339586	0.339586
GCA_004769225.1 Leptospira kanakyensis 201800294	0.339586	0.339586
GCA_004769575.1 Leptospira perdikensis 201702692	0.339586	0.339586
GCA_004770365.1 Leptospira vanthielii 201601955	0.339586	0.339586
GCA_004770445.1 Leptospira bouyouniensis 201601297	0.339586	0.339586
GCA_004770745.1 Leptospira ognonensis 201702476	0.339586	0.339586
GCA_004770905.1 Leptospira bandrabouensis 201601111	0.339586	0.339586
GCA_016918735.1 Leptospira abararensis 201903074	0.339586	0.339586
GCA_008933815.1 Leptonema illini SB12	1	1

## Sheet: Table S4 MASH P1
	Leptospira sanjuanensis LGVF01	Leptospira sanjuanensis LGVF02
JAIZBH00000000 Leptospira sanjuanensis LGVF01	0	-
JAIZBG00000000 Leptospira sanjuanensis LGVF02	0.00751912	0
GCA_003545865.1 Leptospira yasudae B21	0.060969	0.0620782
GCA_002811455.1 Leptospira kmetyi JW2-C-B1	0.13492	0.135534
GCA_002811925.1 Leptospira barantonii FH4-C-A1	0.138407	0.138572
GCA_000347175.1 Leptospira alstonii 79601	0.170926	0.169931
GCA_002811985.1 Leptospira adleri FH2-B-D1	0.172984	0.173336
GCA_003545885.1 Leptospira stimsonii Yale	0.174048	0.173691
GCA_004769425.1 Leptospira gomenensis 201800298	0.174771	0.175878
GCA_001729245.1 Leptospira tipperaryensis GWTS1	0.175506	0.174771
GCA_016918785.1 Leptospira ainazelensis 201903071	0.176252	0.175878
GCA_016919175.1 Leptospira ainlahdjerensis 201903070	0.178567	0.178964
GCA_002811955.1 Leptospira ellisii ATI7-C-A5	0.183572	0.182269
GCA_000313175.2 Leptospira santarosai LT821	0.184461	0.185367
GCA_000244815.3 Leptospira weilii LT2116	0.188197	0.187235
GCA_001444465.1 Leptospira borgpetersenii 56604	0.188686	0.187235
GCA_000243815.3 Leptospira alexanderi L60	0.18918	0.189679
GCA_000306675.3 Leptospira mayottensis 200901116	0.194988	0.195553
GCA_000306255.2 Leptospira noguchii CZ214	0.201619	0.203604
GCA_001584245.1 Leptospira kirschneri ZV013	0.202271	0.202271
GCA_001292615.2 Leptospira interrogans RCA	0.210114	0.211692

## Sheet: Table S5 AA identity
	Leptospira sanjuanensis LGVF01	Leptospira sanjuanensis LGVF02
JAIZBH00000000 Leptospira sanjuanensis LGVF01	100	-
JAIZBG00000000 Leptospira sanjuanensis LGVF02	99.9915	100
GCA_003545865.1 Leptospira yasudae B21	99.8298	99.8383
GCA_002811455.1 Leptospira kmetyi JW2-C-B1	99.6936	99.7021
GCA_002811925.1 Leptospira barantonii FH4-C-A1	99.6681	99.6766
GCA_004769425.1 Leptospira gomenensis 201800298	99.566	99.5489
GCA_002811955.1 Leptospira ellisii ATI7-C-A5	99.5574	99.566
GCA_002811985.1 Leptospira adleri FH2-B-D1	99.5234	99.5319
GCA_003545885.1 Leptospira stimsonii Yale	99.5064	99.5064
GCA_016918785.1 Leptospira ainazelensis 201903071	99.4979	99.5064
GCA_001584245.1 Leptospira kirschneri ZV013	99.4894	99.4979
GCA_000347175.1 Leptospira alstonii 79601	99.4553	99.4553
GCA_016919175.1 Leptospira ainlahdjerensis 201903070	99.4553	99.4638
GCA_000306255.2 Leptospira noguchii CZ214	99.4213	99.4298
GCA_001292615.2 Leptospira interrogans RCA	99.4213	99.4383
GCA_001729245.1 Leptospira tipperaryensis GWTS1	99.4128	99.4213
GCA_000243815.3 Leptospira alexanderi L60	99.3787	99.3872
GCA_000244815.3 Leptospira weilii LT2116	99.3362	99.3362
GCA_000313175.2 Leptospira santarosai LT821	99.2936	99.2936
GCA_000306675.3 Leptospira mayottensis 200901116	99.2851	99.2936
GCA_001444465.1 Leptospira borgpetersenii 56604	99.2085	99.217
GCA_004770055.1 Leptospira semungkisensis SSS9	98.434	98.4511
GCA_004770895.1 Leptospira dzoumogneensis 201601113	98.434	98.4511
GCA_004769195.1 Leptospira fletcheri SSW15	98.4085	98.417
GCA_000306235.2 Leptospira fainei BUT 6	98.3915	98.3915
GCA_002150035.1 Leptospira venezuelensis CLM-U50	98.3915	98.4085
GCA_004769595.1 Leptospira langatensis 201702690	98.3915	98.4085
GCA_004771275.1 Leptospira fluminis SCS5	98.3915	98.4
GCA_002811865.1 Leptospira perolatii FH1-B-C1	98.383	98.4
GCA_002812205.1 Leptospira neocaledonica ES4-C-A1	98.383	98.4
GCA_003112675.1 Leptospira johnsonii E8	98.383	98.4
GCA_000216455.2 Leptospira licerasiae MMD0835	98.3745	98.3915
GCA_000243715.3 Leptospira broomii 5399	98.3745	98.383
GCA_002811475.1 Leptospira hartskeerlii MCA2-B-A3	98.3745	98.3915
GCA_004770835.1 Leptospira selangorensis 201702406	98.3745	98.3915
GCA_004769555.1 Leptospira koniambonensis 201800265	98.366	98.383
GCA_004769615.1 Leptospira sarikeiensis 201702455	98.366	98.383
GCA_002811765.1 Leptospira saintgironsiae FH4-C-A2	98.3489	98.366
GCA_004770705.1 Leptospira wolffii 201702691	98.3489	98.366
GCA_002812045.1 Leptospira haakeii ATI7-C-A4	98.3404	98.3574
GCA_004770105.1 Leptospira andrefontaineae 201800301	98.3404	98.3574
GCA_001704175.2 Leptospira inadai M34-99	98.2894	98.2979
GCA_003114855.1 Leptospira ryugenii YH101	97.6681	97.6766
GCA_000304275.1 Leptospira meyeri Went 5	97.634	97.634
GCA_004769665.1 Leptospira kemamanensis 201702454	97.6255	97.634
GCA_004769775.1 Leptospira jelokensis 201702419	97.6255	97.634
GCA_004770145.1 Leptospira bourretii 201800267	97.6255	97.6255
GCA_004770745.1 Leptospira ognonensis 201702476	97.6255	97.617
GCA_000332495.2 Leptospira terpstrae ATCC 700639	97.617	97.617
GCA_004770445.1 Leptospira bouyouniensis 201601297	97.617	97.617
GCA_000332475.2 Leptospira yanagawae ATCC 700523	97.6085	97.617
GCA_004769455.1 Leptospira montravelensis 201800279	97.6085	97.6085
GCA_004770475.1 Leptospira mtsangambouensis 201601298	97.6	97.6
GCA_000332515.2 Leptospira wolbachii CDC	97.5915	97.5915
GCA_004770905.1 Leptospira bandrabouensis 201601111	97.5915	97.5915
GCA_016919165.1 Leptospira chreensis 201903075	97.5915	97.5915
GCA_002811945.1 Leptospira harrisiae FH2-B-A1	97.583	97.583
GCA_004770765.1 Leptospira noumeaensis 201800287	97.583	97.5915
GCA_002812125.1 Leptospira brenneri JW2-C-A2	97.566	97.566
GCA_004769225.1 Leptospira kanakyensis 201800294	97.566	97.566
GCA_004770215.1 Leptospira congkakensis 201702425	97.566	97.583
GCA_004770365.1 Leptospira vanthielii 201601955	97.566	97.566
GCA_016918735.1 Leptospira abararensis 201903074	97.566	97.566
GCA_003114815.1 Leptospira ellinghausenii E18	97.5489	97.566
GCA_004770995.1 Leptospira idonii 201300427	97.5404	97.5404
GCA_002812165.1 Leptospira levettii CN6-C-A1	97.5319	97.5404
GCA_004769575.1 Leptospira perdikensis 201702692	97.5319	97.5404
GCA_000017605.1 Leptospira biflexa Patoc 1 Ames	97.5234	97.5319
GCA_003114835.2 Leptospira kobayashii E30	97.4383	97.4553
GCA_004771005.1 Leptospira ilyithenensis 201400974	97.3872	97.3957

## Sheet: Table S6 ANI
	Leptospira sanjuanensis LGVF01	Leptospira sanjuanensis LGVF02
JAIZBH00000000 Leptospira sanjuanensis LGVF01	100	-
JAIZBG00000000 Leptospira sanjuanensis LGVF02	99.2173	100
GCA_003545865.1 Leptospira yasudae B21	93.198	93.1097
GCA_004769775.1 Leptospira jelokensis 201702419	92.164	89.4306
GCA_000304275.1 Leptospira meyeri Went 5	91.9883	91.9883
GCA_004770905.1 Leptospira bandrabouensis 201601111	91.8321	89.0567
GCA_004770365.1 Leptospira vanthielii 201601955	90.3433	90.3433
GCA_004769575.1 Leptospira perdikensis 201702692	90.3414	90.3414
GCA_003114815.1 Leptospira ellinghausenii E18	90.113	90.113
GCA_000332475.2 Leptospira yanagawae ATCC 700523	89.8899	88.7339
GCA_004770745.1 Leptospira ognonensis 201702476	89.2788	89.2788
GCA_004769665.1 Leptospira kemamanensis 201702454	89.1932	90.1978
GCA_016918735.1 Leptospira abararensis 201903074	88.9476	88.9642
GCA_016919165.1 Leptospira chreensis 201903075	88.9398	88.855
GCA_004770445.1 Leptospira bouyouniensis 201601297	88.7985	87.5626
GCA_004770475.1 Leptospira mtsangambouensis 201601298	88.5311	88.5202
GCA_000332495.2 Leptospira terpstrae ATCC 700639	88.4293	88.1815
GCA_000332515.2 Leptospira wolbachii CDC	88.2894	87.5641
GCA_003114855.1 Leptospira ryugenii YH101	88.0985	88.133
GCA_004770145.1 Leptospira bourretii 201800267	87.9897	87.8958
GCA_002812165.1 Leptospira levettii CN6-C-A1	87.9413	87.9193
GCA_004769225.1 Leptospira kanakyensis 201800294	87.8999	87.8999
GCA_002811865.1 Leptospira perolatii FH1-B-C1	87.6211	87.1406
GCA_004770765.1 Leptospira noumeaensis 201800287	87.5375	87.007
GCA_004769455.1 Leptospira montravelensis 201800279	87.4541	87.349
GCA_004770215.1 Leptospira congkakensis 201702425	87.3501	87.3062
GCA_002812125.1 Leptospira brenneri JW2-C-A2	87.2069	85.8112
GCA_000243715.3 Leptospira broomii 5399	86.4806	85.6555
GCA_000306235.2 Leptospira fainei BUT 6	86.1427	87.4055
GCA_002811945.1 Leptospira harrisiae FH2-B-A1	85.9185	85.8528
GCA_004769195.1 Leptospira fletcheri SSW15	85.8561	86.0043
GCA_004771005.1 Leptospira ilyithenensis 201400974	85.6585	86.5913
GCA_002811765.1 Leptospira saintgironsiae FH4-C-A2	85.639	85.5756
GCA_002811455.1 Leptospira kmetyi JW2-C-B1	85.5139	85.5092
GCA_000017605.1 Leptospira biflexa Patoc 1 Ames	85.4825	86.2951
GCA_002812045.1 Leptospira haakeii ATI7-C-A4	85.4815	85.7251
GCA_002811925.1 Leptospira barantonii FH4-C-A1	85.1547	85.1315
GCA_001704175.2 Leptospira inadai M34-99	85.1379	84.3968
GCA_002811475.1 Leptospira hartskeerlii MCA2-B-A3	84.8957	85.0773
GCA_003114835.2 Leptospira kobayashii E30	84.8242	84.7028
GCA_004769615.1 Leptospira sarikeiensis 201702455	84.4441	84.1607
GCA_002150035.1 Leptospira venezuelensis CLM-U50	84.3858	84.6841
GCA_004769425.1 Leptospira gomenensis 201800298	84.3436	84.3013
GCA_000347175.1 Leptospira alstonii 79601	84.3215	84.355
GCA_003112675.1 Leptospira johnsonii E8	84.2698	84.2206
GCA_004770105.1 Leptospira andrefontaineae 201800301	84.2635	84.0372
GCA_004770895.1 Leptospira dzoumogneensis 201601113	84.153	84.4363
GCA_004769555.1 Leptospira koniambonensis 201800265	84.045	83.9092
GCA_002811955.1 Leptospira ellisii ATI7-C-A5	84.0145	84.0032
GCA_004770705.1 Leptospira wolffii 201702691	83.9039	83.486
GCA_004771275.1 Leptospira fluminis SCS5	83.8925	84.2891
GCA_000216455.2 Leptospira licerasiae MMD0835	83.8694	84.0297
GCA_004770835.1 Leptospira selangorensis 201702406	83.8355	84.6984
GCA_002811985.1 Leptospira adleri FH2-B-D1	83.8012	83.749
GCA_004770055.1 Leptospira semungkisensis SSS9	83.7519	83.8422
GCA_000244815.3 Leptospira weilii LT2116	83.7466	83.7525
GCA_000243815.3 Leptospira alexanderi L60	83.7138	83.6859
GCA_000313175.2 Leptospira santarosai LT821	83.6879	83.6606
GCA_004769595.1 Leptospira langatensis 201702690	83.678	83.708
GCA_016919175.1 Leptospira ainlahdjerensis 201903070	83.6748	83.7257
GCA_004770995.1 Leptospira idonii 201300427	83.6702	84.2516
GCA_001444465.1 Leptospira borgpetersenii 56604	83.5814	83.572
GCA_016918785.1 Leptospira ainazelensis 201903071	83.5638	83.5605
GCA_003545885.1 Leptospira stimsonii Yale	83.5612	83.6105
GCA_002812205.1 Leptospira neocaledonica ES4-C-A1	83.549	83.4664
GCA_000306675.3 Leptospira mayottensis 200901116	83.5392	83.5735
GCA_001729245.1 Leptospira tipperaryensis GWTS1	83.5147	83.5472
GCA_001584245.1 Leptospira kirschneri ZV013	83.1196	83.0716
GCA_000306255.2 Leptospira noguchii CZ214	82.9539	82.881
GCA_001292615.2 Leptospira interrogans RCA	82.9084	82.8708

## Sheet: TableS7 Serotyping
	Serogroup	Serovar	Strain	Batch Number
1	Australis	Australis	Ballico	2016.06.585751
2	Australis	Bratislava	Jez Bratislava	2016.06-585750
3	Autumnalis	Bangkinang	Bangkinang I	20040824-967
4	Autumnalis	Butembo	Butembo	2002-05-21:247
5	Autumnalis	Carlos	C3	20040610-810
6	Autumnalis	Rachmati	Rachmat	19982947-374
7	Ballum	Ballum	Mus 127	20010926-895
8	Ballum	Kenya	Njenga	20040610-811
9	Bataviae	Bataviae	Swart	2020.04-777116
10	Canicola	Canicola	Hond Utrecht IV	2011.01-27466
11	Canicola	Schueffneri	Vleermuis 90 C	09-09-1968:752
12	Celledoni	Celledoni	Celledoni	20040824-969
13	Cynopteri	Cynopteri	3522 C	2017.12-652464
14	Djasiman	Djasiman	Djasiman	20040824-970
15	Grippotyphosa	Grippotyphosa	Moskva V	2008.09NL08099
16	Grippotyphosa	Huanuco	M 4	20010926-897
17	Hebdomadis	Hebdomadis	Hebdomadis	2007.02.NL06176
18	Hebdomadis	Worsfoldi	Worsfold	23-04-1981:8-072
19	Icterohaemorrhagiae	Copenhageni	Wijnberg	2014.09-11390
20	Icterohaemorrhagiae	Icterohaemorrhagiae	RGA	2013.12.452941
21	Javanica	Poi	Poi	19982947-376
22	Louisiana	Louisiana	LSU 1945	2007.02.NL06182
23	Manhao	Manhao	L 60	2007.02.NL06183
24	Mini	Mini	Sari	2010.09-12292
25	Panama	Panama	CZ 214 K	2016.06-58754
26	Pomona	Pomona	Pomona	2016.06.585753
27	Pyrogenes	Pyrogenes	Salinem	2013.12-452942
28	Sarmin	Rio	Rr 5	2007.02.NL06185
29	Sarmin	Weaveri	CZ 390	199808198-201
30	Sejroe	Hardjo type Prajitno	Hardjoprajitno	2013.11-452943
31	Sejroe	Saxkoebing	Mus 24	20010926-901
32	Shermani	Shermani	1342 K	2016.06-58756
33	Tarassovi	Bakeri	LT 79	11-09-1980 :7-107
34	Tarassovi	Mogden	Compton	20080922NL08101
35	Tarassovi	Rama	316	20040610-806
36	Tarassovi	Tarassovi	Perepelitsin	2013.12-452946
37	Semaranga	Patoc	Patoc I	2013.12-452945
38	Hurstbridge	Hurstbridge	BUT 6	19982947-379
39	Leptonema	Illini	3055	02-08-1974:886
40	Ranarum	Ranarum	ICF	11-12-1996/305
41	Genomospecies 1	Sichuan	79601	27-07-90/0-512
42	Difco contaminant			20010926-902
43	Lyme	Lyme	10	2000.02.22:9-386

## Sheet: TableS8 MAT
Species	Serogroup	Serovar	Strain
L. interrogans	Australis	Bratislava	Jez Bratislava
L. interrogans	Australis	Australis	Ballico
L. interrogans	Autumnalis	Autumnalis	Akiyami A
L. borgpetersenii	Ballum	Ballum	S 102
L. interrogans	Bataviae	Bataviae	Van Tienen
L. interrogans	Canicola	Canicola	H. Utrecht IV
L. kirschneri	Cynopteri	Cynopteri	3522C
L. interrogans	Djasiman	Djasiman	Djasiman
L. interrogans	Grippotyphosa	Grippotyphosa	Andaman
L. interrogans	Hebdomadis	Hebdomadis	Hebdomadis
L. interrogans	Icterohaemorrhagiae	Copenhageni	M 20
L. interrogans	Mini	Szwajizak	Szwajizak
L. interrogans	Pomona	Pomona	Pomona
L. interrogans	Pyrogenes	Pyrogenes	Salinem
L. interrogans	Sejröe	Hardjo	Hardjoprajitno
L. borgpetersenii	Sejröe	Sejröe	M 84
L. borgpetersenii	Tarassovi	Tarassovi	Perepelicin
L. tipperaryensis	Not determined	Room 22	GWTS#1
